# Supplementary material for: HLA alleles and sustained peanut consumption promote IgG4 responses in subjects protected from peanut allergy
Source: JCI journal article supplement (doi:10.1172/jci152070), 2022-01-03
Supplement: sd1 [file 1]

1 **Supplemental figures and figure legends**

2 **Supplementary Figure 1:** Regional association plots of HLA SNP associations with primary  
 3 phenotypes of peanut specific IgG4 (psIgG4), peanut specific IgE (psIgE) and PA in LEAP  
 4 consumption and avoidance group at 60 months. Red line shows statistically significant  
 5 association ( $P=5.13 \times 10^{-6}$ , after correcting for 9,742 SNPs in the HLA region). Purple  
 6 diamonds are the SNPs with lowest P-value for each trait.  
 7

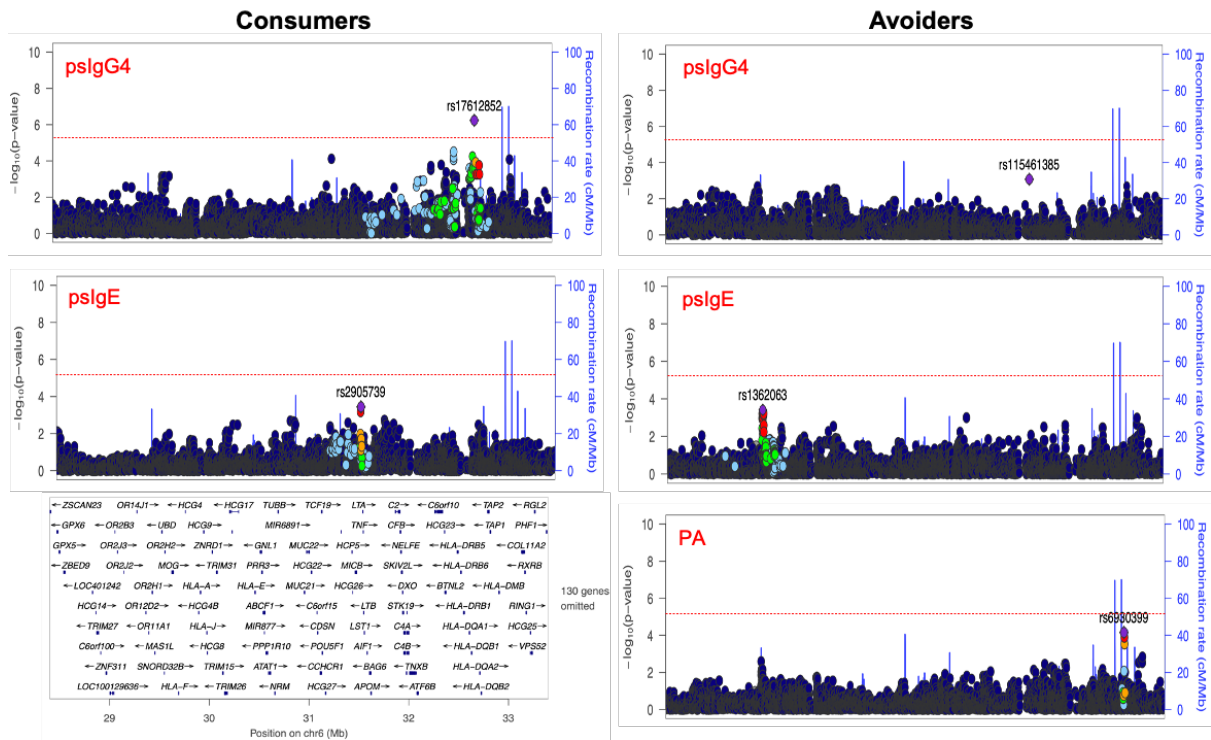

8  
 9  
 10  
 11  
 12  
 13  
 14  
 15  
 16  
 17

18 **Supplementary Figure 2:** Regional association plots of HLA SNP associations with psIgG4  
 19 showing [A] the primary analysis and [B] a conditional analysis where SNPs are tested  
 20 conditioned on the primary variant rs17612852.  
 21  
 22

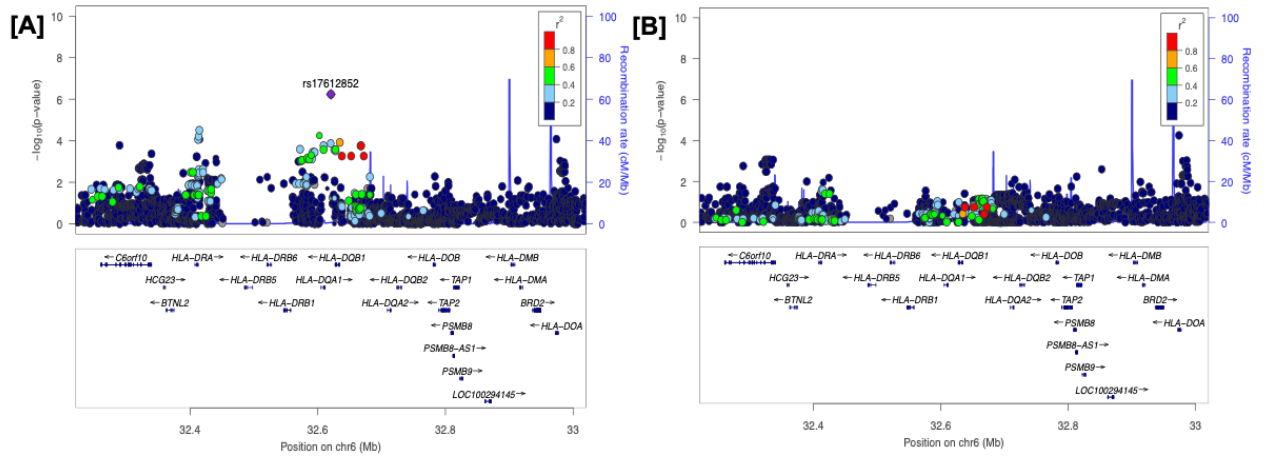

23  
 24  
 25  
 26  
 27  
 28  
 29  
 30  
 31  
 32  
 33  
 34  
 35  
 36  
 37  
 38  
 39  
 40  
 41  
 42  
 43  
 44  
 45  
 46  
 47  
 48  
 49  
 50  
 51

52 **Supplementary Figure 3:** Regional association plots the HLA Class II region. Top row is the  
 53 association for log<sub>10</sub>(psIgG4) and log<sub>10</sub>(Ara h 2) at 60 months. Rows 2-4 are the eQTLs for  
 54 the same variants for each of 7 genes expressed in the CD4 T cells. The color of each dot  
 55 represents its correlation to the peak variant rs17612852 (see r<sub>2</sub> legend). The purple diamond  
 56 represents index variant rs17612852, and the blue box is drawn around HLA-DQA1\*01:02.  
 57 Red dashed line represents Bonferroni thresholds for the trait associations ( $p < 5.13 \times 10^{-6}$ ) and  
 58 eQTLs ( $p < 3.71 \times 10^{-6}$ ).  
 59  
 60

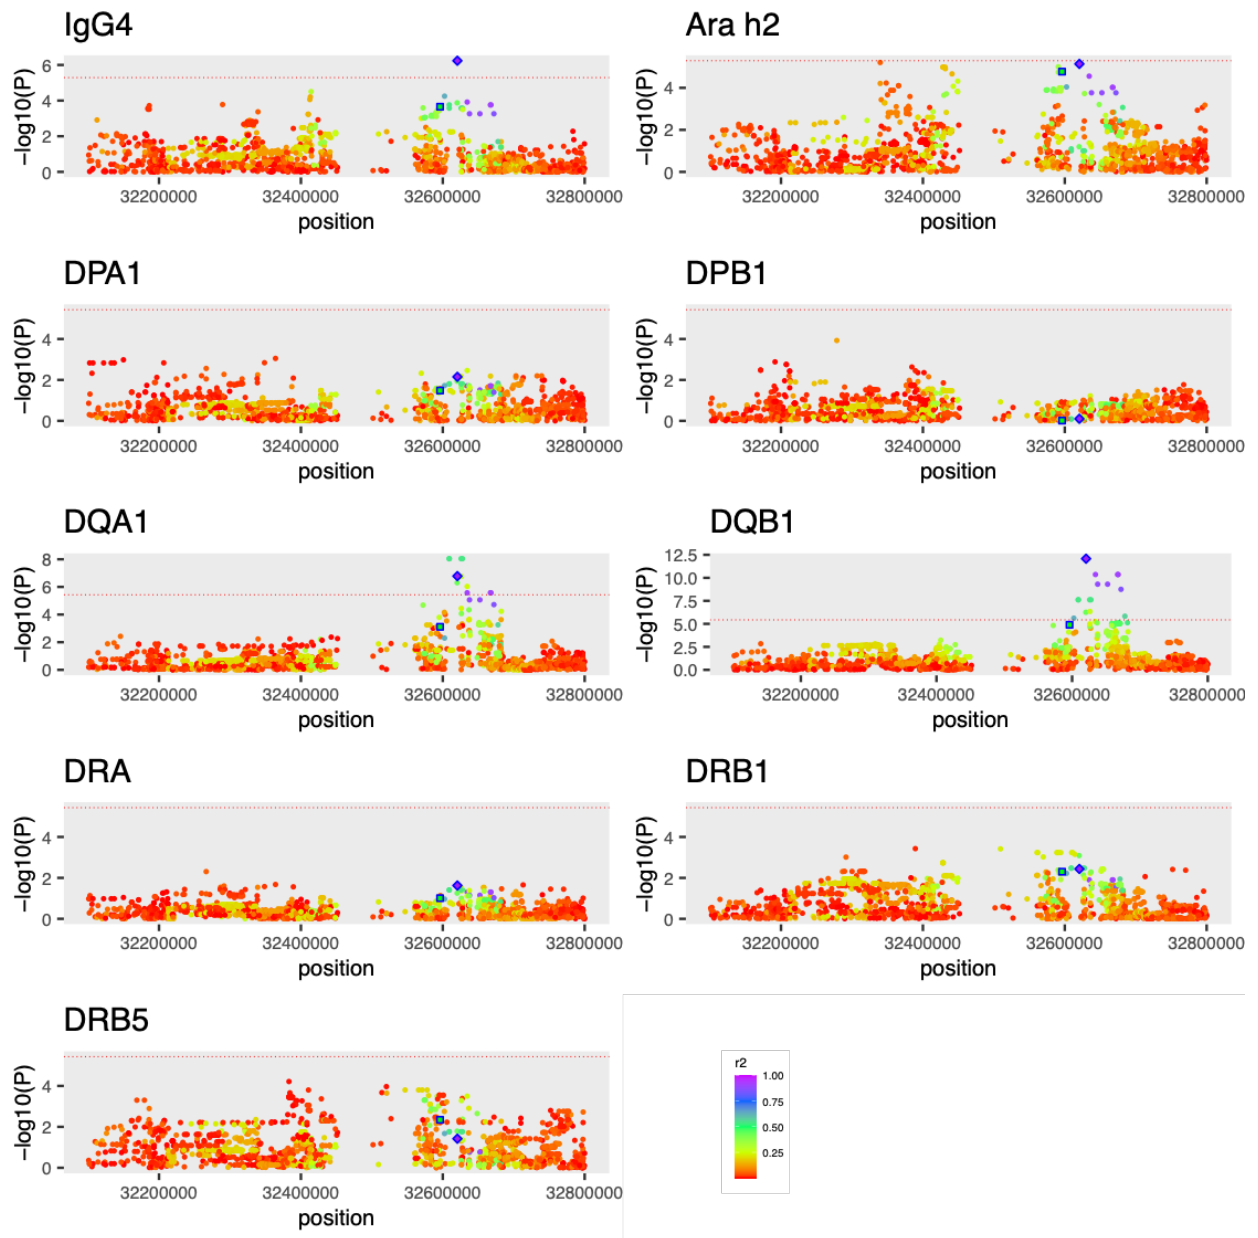

61  
 62  
 63  
 64  
 65  
 66  
 67  
 68

69 **Supplementary Figure 4:** Co-localization analysis between the eQTLs for Class II gene  
70 expression (*HLA-DQA1* and *HLA-DQB1*) in CD4 T cells and phenotype associations noted for  
71 psIgG4. **Panel A** shows the correlation between the p-values noted for the IgG4 associations  
72 and eQTLs for each variant for DQA1 (*upper*) and DQB1 (*lower*); the blue diamond is sentinel  
73 variant rs17612852. The p-value for the IgG4 association is same in the upper and lower plot,  
74 but the eQTL p-values differ. It is noted that for DQA1 (*upper*), the strongest IgG4 SNP, is not  
75 a perfect match for the strongest DQA1 gene eQTL; there are several SNPs with stronger  
76 regulatory evidence for gene expression (green oval). In contrast for DQB1, the strongest eQTL  
77 SNP perfectly matches the strongest IgG4 SNP rs17612852. **Panel B** is the SuSie fine-mapping  
78 for *HLA-DQB1* eQTLs showing a single credible set (CS1) with the sentinel variant  
79 rs17612852 identified as the target variant. This is additional evidence that there is perfect co-  
80 localization between the IgG4 association and regulatory evidence for *HLA-DQB1*. Also  
81 marked is *HLA-DQA1\*01:02* which is not identified in a credible set for *HLA-DQB1*  
82 expression.

83  
84

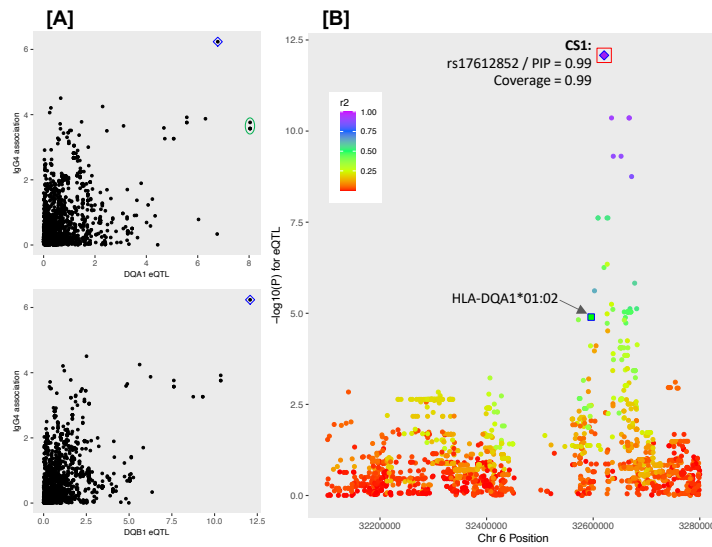

85  
86  
87  
88  
89  
90  
91  
92  
93  
94  
95  
96

97 **Supplementary Figure 5:** Associations of HLA-DQA1\*01:02 and *MALT1* (rs57265082) with  
 98 psIgG4 and psIgE over time. Figures show the  $-\log(P\text{-value})$  across the visits, and tables have  
 99 the effect sizes for the variants for  $\log_{10}(\text{psIgE})$  and  $\log_{10}(\text{psIgG4})$ . The effect sizes represent  
 100 the difference in the mean between the two groups (carrier vs. non-carrier) on the  $\log_{10}$  scale.  
 101  
 102

**[A] HLA-DQA1\*01:02 / LEAP Consumption Group**

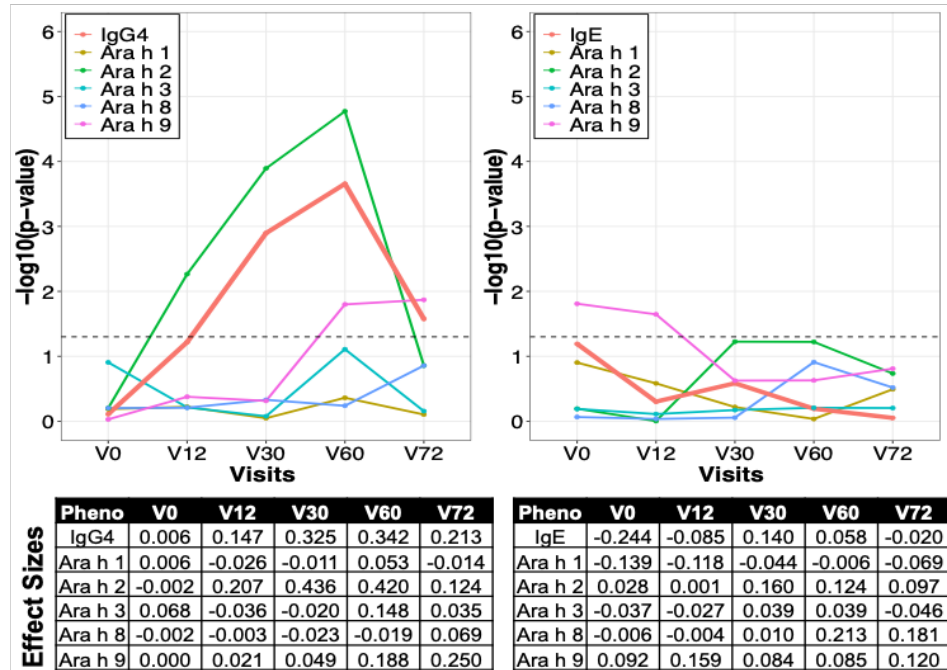

**[B] MALT1 (rs57265082) / LEAP Avoidance Group**

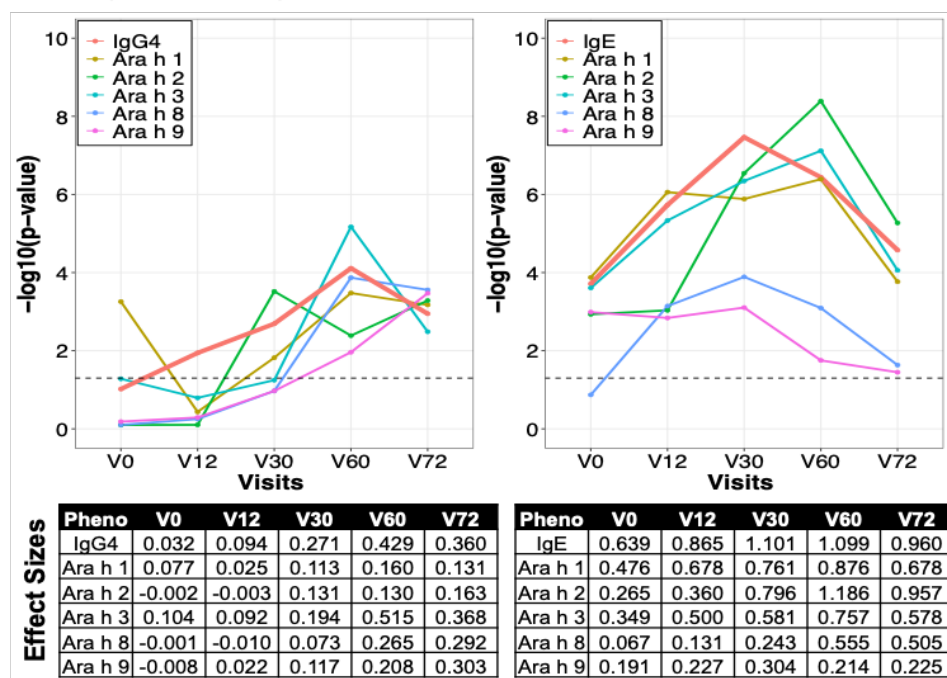

103  
 104  
 105  
 106  
 107

108 **Supplementary Figure 6:** Associations of HLA-DQA1\*01:02 and *MALT1* (rs57265082) with  
 109 psIgG4 and psIgE over time in Consumption and Avoidance groups. Figures show the  $-\log(P$ -  
 110 value) across the visits, and tables have the effect sizes for the variants for  $\log_{10}(\text{psIgE})$  and  
 111  $\log_{10}(\text{psIgG4})$ . The effect sizes represent the difference in the mean between the two groups  
 112 (carrier vs. non-carrier) on the  $\log_{10}$  scale.  
 113  
 114

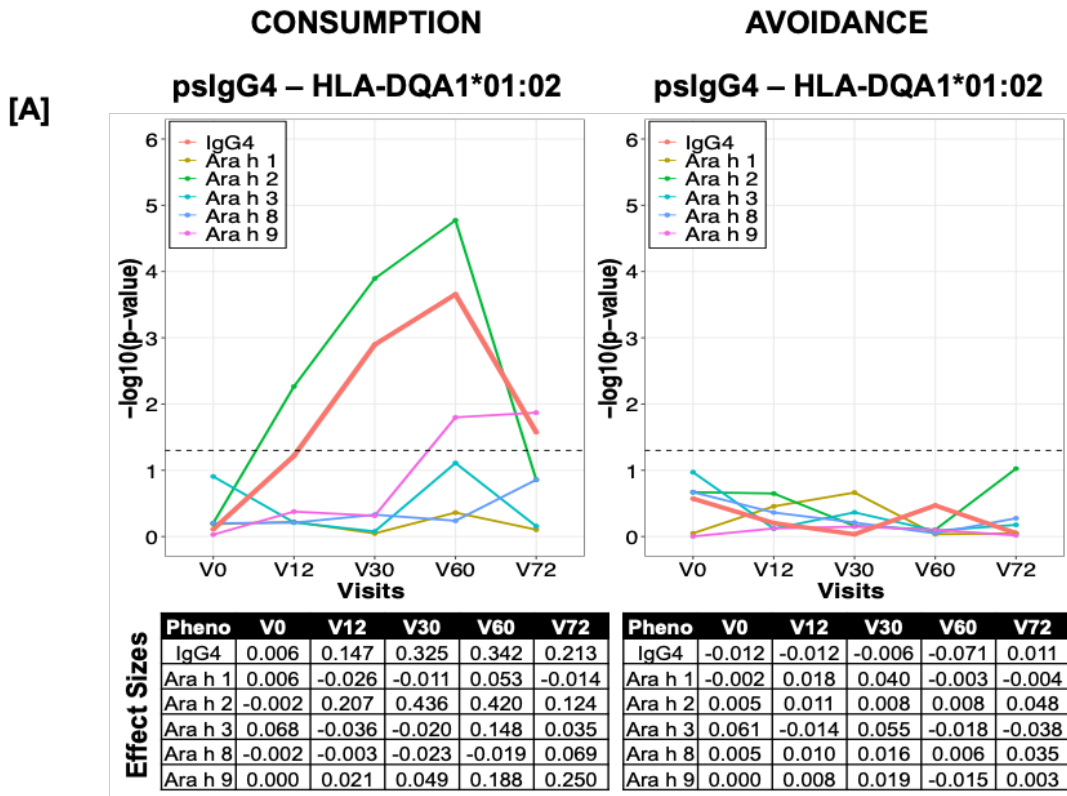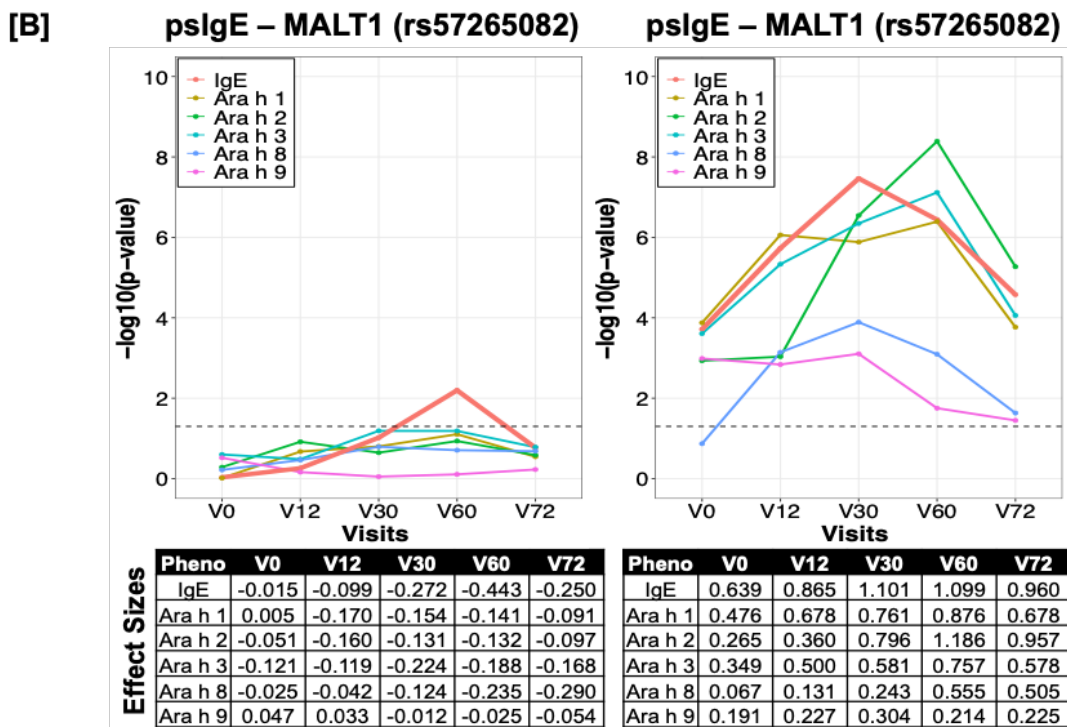

115

116 **Supplementary Figure 7:** Relative distribution of psIgG4 and psIgE, and IgG4 and IgE to  
 117 peanut components by carrier status at HLA-DQA1\*01:02 and *MALT1* SNP rs57265082,  
 118 across all visits. Unadjusted mean values of the phenotypes stratified by variants carrier status  
 119 at each assessment and by treatment group assignment are shown with bootstrapped 95%  
 120 confidence intervals and P-values. Dashed line at 60 months of age depicts the end of LEAP  
 121 trial at which all participants avoided peanut consumption for 12 months.  
 122  
 123

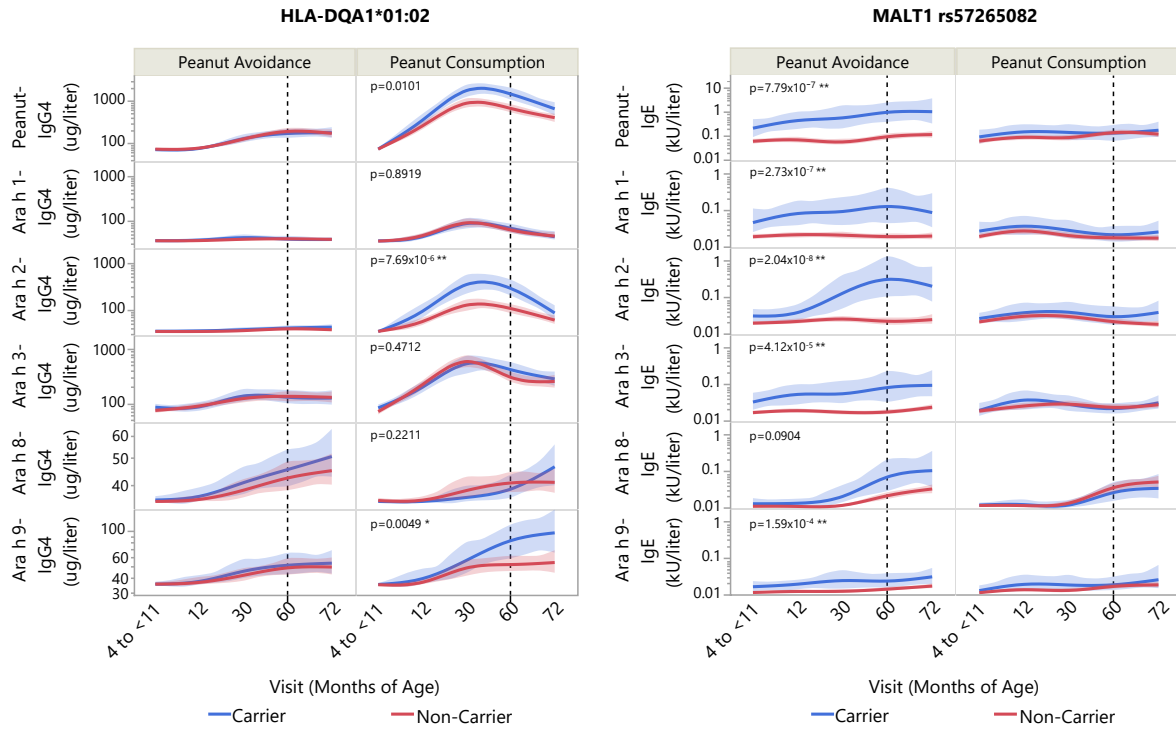

124  
 125  
 126  
 127  
 128  
 129  
 130  
 131  
 132  
 133  
 134  
 135  
 136  
 137

138 **Supplemental Figure 8:** Association of mean linear epitope bindings with genotypes at 60  
 139 months vs. baseline in peanut exposure groups subdivided by outcome. In **[A and B]** bars  
 140 represent the changes in expansion of z-scores of mean bindings per peanut component from  
 141 baseline to visit 60. Stars indicate significance in differences between the two  
 142 genotypes. **[A]** ses-IgG4 expansion by HLA-DQA1\*01:02 genotype. **[B]** ses-IgE expansion  
 143 by *MALT1* genotype status; error-bars in all panels represent confidence intervals:  
 144 Mean±95%CI; sample size within each group is represented in brackets.  
 145

**[A] HLA-DQA1\*01:02**

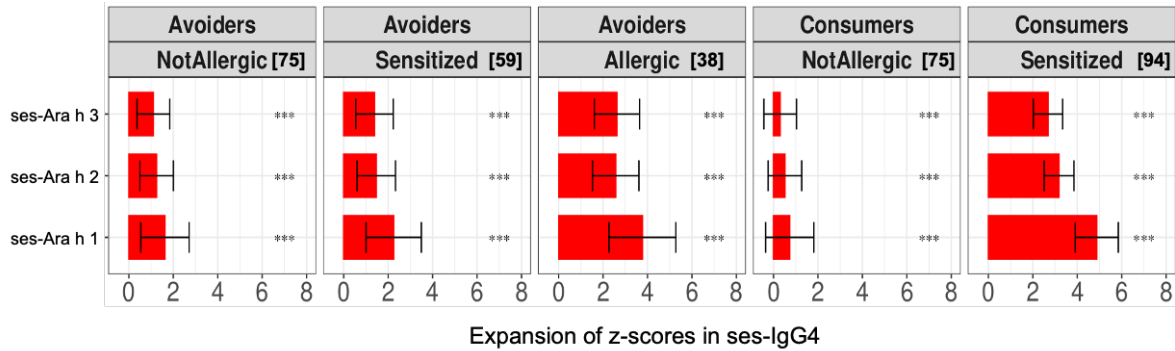

**[B] MALT1 (rs57265082)**

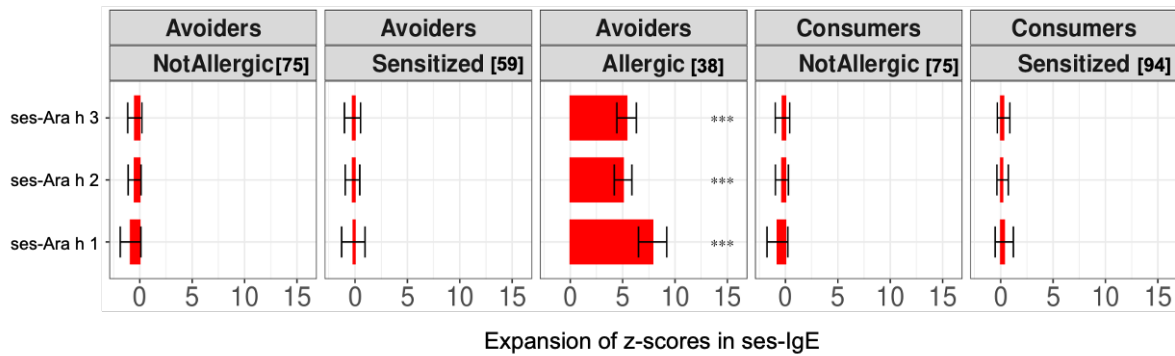

146  
 147  
 148  
 149  
 150  
 151  
 152  
 153  
 154  
 155



156 **Supplementary Figure 9:** Canonical Correlation Analysis (CCA) evaluating the association  
 157 of the linear epitopes in ses-IgG4 belonging to groups related to Ara h 1, h 2 and h 3 with HLA-  
 158 DQA1\*01:02 and ses-IgE Ara h 1, h 2 and h 3 with *MALT1* rs57265082 over time in the  
 159 Consumption and Avoidance groups. Dashed lines indicate significance level at  $p=0.05$ .  
 160  
 161

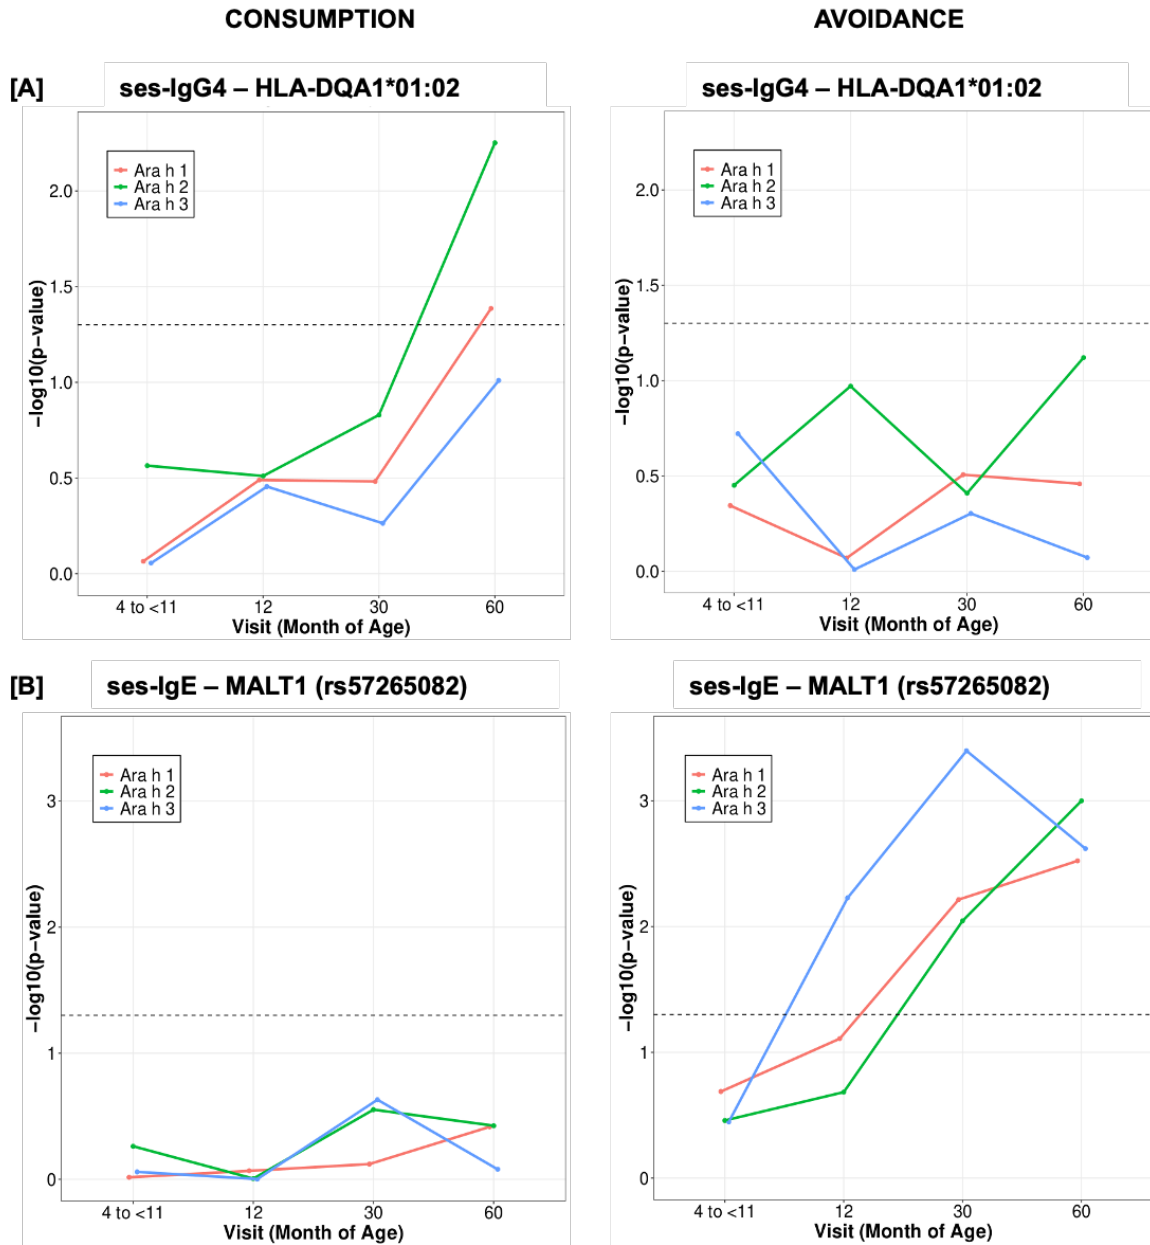

162  
 163  
 164  
 165  
 166

167 **Supplementary Tables:**

168 **Table S1:** Association analysis results for all 38 HLA alleles with primary phenotypes of  
 169 peanut allergy, psIgG4 and psIgE at 60 months. Results with p<0.05 are bolded.

170

| Gene*Allele    | Allele Freq (%)    |                  |                   | PA          |                 | psIgE         |                 |               |                 | psIgG4        |                 |               |                 |
|----------------|--------------------|------------------|-------------------|-------------|-----------------|---------------|-----------------|---------------|-----------------|---------------|-----------------|---------------|-----------------|
|                | Full Group (N=542) | Avoiders (N=275) | Consumers (N=267) | OR          | P-Value         | Avoiders      |                 | Consumers     |                 | Avoiders      |                 | Consumers     |                 |
|                |                    |                  |                   |             |                 | Beta          | P-Value         | Beta          | P-Value         | Beta          | P-Value         | Beta          | P-Value         |
| HLA-A*03:01    | 11.41%             | 11.76%           | 11.04%            | 0.98        | 9.52E-01        | -0.192        | 2.52E-01        | -0.104        | 4.65E-01        | 0.018         | 8.23E-01        | -0.061        | 5.75E-01        |
| HLA-A*01:01    | 14.48%             | 15.10%           | 13.86%            | 1.62        | 2.05E-01        | 0.198         | 2.21E-01        | 0.029         | 8.29E-01        | -0.008        | 9.20E-01        | -0.102        | 3.17E-01        |
| HLA-A*24:02    | 9.42%              | 7.45%            | 11.45%            | 0.39        | 1.42E-01        | -0.075        | 7.19E-01        | 0.060         | 6.82E-01        | -0.042        | 6.82E-01        | 0.183         | 9.63E-02        |
| HLA-A*11:01    | 5.95%              | 4.71%            | 7.23%             | 1.82        | 2.69E-01        | 0.308         | 2.26E-01        | -0.207        | 6.94E-01        | 0.243         | 5.48E-02        | 0.070         | 6.09E-01        |
| HLA-A*02:01    | 27.38%             | 28.63%           | 26.10%            | <b>0.46</b> | <b>3.35E-02</b> | <b>-0.371</b> | <b>9.73E-03</b> | 0.025         | 8.29E-01        | <b>-0.175</b> | <b>1.24E-02</b> | 0.051         | 5.68E-01        |
| HLA-B*07:02    | 10.39%             | 11.15%           | 9.60%             | 0.79        | 5.87E-01        | -0.323        | 6.51E-02        | <b>-0.291</b> | <b>4.65E-02</b> | -0.016        | 8.51E-01        | 0.159         | 1.61E-01        |
| HLA-B*08:01    | 10.20%             | 11.92%           | 8.40%             | 1.72        | 1.61E-01        | 0.255         | 1.40E-01        | -0.059        | 7.14E-01        | 0.072         | 4.04E-01        | -0.203        | 1.06E-01        |
| HLA-B*44:02    | 9.12%              | 9.04%            | 9.20%             | 1.37        | 4.67E-01        | 0.163         | 3.93E-01        | -0.184        | 2.26E-01        | -0.066        | 4.83E-01        | -0.064        | 5.88E-01        |
| HLA-B*44:03    | 6.27%              | 6.92%            | 5.60%             | 1.04        | 9.42E-01        | 0.135         | 5.16E-01        | -0.053        | 7.64E-01        | 0.194         | 6.00E-02        | -0.075        | 5.86E-01        |
| HLA-B*40:01    | 5.29%              | 4.81%            | 5.80%             | 0.32        | 1.47E-01        | -0.043        | 8.61E-01        | -0.031        | 8.67E-01        | -0.052        | 6.63E-01        | 0.024         | 8.68E-01        |
| HLA-C*07:02    | 11.22%             | 11.05%           | 11.39%            | 0.98        | 9.60E-01        | -0.242        | 1.66E-01        | <b>-0.303</b> | <b>2.80E-02</b> | -0.053        | 5.37E-01        | 0.025         | 8.14E-01        |
| HLA-C*07:01    | 13.83%             | 15.89%           | 11.78%            | 1.54        | 2.39E-01        | 0.175         | 2.74E-01        | 0.149         | 2.85E-01        | 0.061         | 4.39E-01        | 0.032         | 7.58E-01        |
| HLA-C*06:02    | 8.90%              | 7.75%            | 10.04%            | 2.23        | 5.68E-02        | 0.383         | 6.16E-02        | -0.121        | 4.00E-01        | 0.029         | 7.70E-01        | -0.164        | 1.31E-01        |
| HLA-C*04:01    | 10.64%             | 11.05%           | 10.23%            | 0.59        | 2.91E-01        | -0.101        | 5.89E-01        | -0.113        | 4.40E-01        | 0.083         | 3.63E-01        | 0.079         | 4.81E-01        |
| HLA-C*16:01    | 5.61%              | 6.01%            | 5.21%             | 0.96        | 9.34E-01        | 0.068         | 7.62E-01        | 0.166         | 3.86E-01        | 0.026         | 8.12E-01        | 0.048         | 7.41E-01        |
| HLA-C*03:04    | 7.45%              | 7.17%            | 7.72%             | 0.39        | 1.41E-01        | -0.176        | 3.91E-01        | 0.126         | 4.36E-01        | -0.092        | 3.59E-01        | 0.044         | 7.17E-01        |
| HLA-C*05:01    | 8.22%              | 8.91%            | 7.53%             | 0.94        | 8.92E-01        | 0.020         | 9.19E-01        | -0.105        | 5.16E-01        | -0.068        | 4.73E-01        | 0.017         | 8.89E-01        |
| HLA-C*12:03    | 5.03%              | 5.62%            | 4.44%             | 0.36        | 1.90E-01        | -0.325        | 1.78E-01        | -0.097        | 6.48E-01        | -0.086        | 4.68E-01        | -0.057        | 7.21E-01        |
| HLA-G*01:01    | 77.73%             | 79.42%           | 75.99%            | 0.43        | 1.64E-01        | <b>-0.650</b> | <b>3.61E-02</b> | 0.163         | 4.43E-01        | -0.380        | <b>1.57E-02</b> | -0.021        | 8.96E-01        |
| HLA-G*01:04    | 13.18%             | 12.88%           | 13.49%            | 0.96        | 9.28E-01        | 0.009         | 9.63E-01        | -0.073        | 5.94E-01        | 0.108         | 2.44E-01        | 0.061         | 5.61E-01        |
| HLA-L*01:01    | 76.04%             | 76.95%           | 75.10%            | 0.90        | 8.52E-01        | 0.101         | 7.11E-01        | -0.249        | 2.40E-01        | -0.128        | 3.43E-01        | -0.203        | 2.14E-01        |
| HLA-L*01:02    | 23.96%             | 23.05%           | 24.90%            | 0.64        | 2.32E-01        | 0.025         | 8.72E-01        | 0.099         | 3.91E-01        | -0.008        | 9.12E-01        | 0.132         | 1.41E-01        |
| HLA-DQA1*03:01 | 9.18%              | 7.71%            | 10.70%            | 0.94        | 9.06E-01        | -0.166        | 4.10E-01        | -0.231        | 9.39E-02        | -0.170        | 9.09E-02        | -0.067        | 5.21E-01        |
| HLA-DQA1*05:05 | 12.43%             | 9.96%            | 14.98%            | 0.90        | 8.12E-01        | 0.024         | 8.98E-01        | 0.017         | 8.92E-01        | 0.067         | 4.67E-01        | 0.031         | 7.50E-01        |
| HLA-DQA1*01:02 | 16.92%             | 18.42%           | 15.37%            | <b>1.99</b> | <b>4.37E-02</b> | -0.095        | 5.22E-01        | 0.057         | 6.46E-01        | -0.071        | 3.40E-01        | <b>0.342</b>  | <b>2.21E-04</b> |
| HLA-DQA1*05:01 | 12.72%             | 13.35%           | 12.06%            | 1.29        | 4.95E-01        | 0.082         | 6.13E-01        | -0.101        | 4.63E-01        | 0.020         | 8.03E-01        | <b>-0.250</b> | <b>1.58E-02</b> |
| HLA-DQA1*01:01 | 10.04%             | 10.15%           | 9.92%             | 0.56        | 2.63E-01        | -0.121        | 5.02E-01        | 0.010         | 9.46E-01        | -0.022        | 8.11E-01        | -0.034        | 7.52E-01        |
| HLA-DQA1*01:03 | 6.50%              | 5.83%            | 7.20%             | 0.76        | 6.37E-01        | 0.092         | 6.76E-01        | 0.141         | 3.81E-01        | 0.099         | 3.69E-01        | <b>0.278</b>  | <b>2.15E-02</b> |
| HLA-DQA1*02:01 | 14.24%             | 15.60%           | 12.84%            | 0.92        | 8.34E-01        | 0.142         | 3.60E-01        | 0.066         | 6.12E-01        | 0.069         | 3.76E-01        | -0.127        | 1.95E-01        |
| HLA-DQA1*03:03 | 8.60%              | 8.27%            | 8.95%             | 0.94        | 8.96E-01        | 0.113         | 5.53E-01        | -0.052        | 7.33E-01        | 0.006         | 9.49E-01        | -0.197        | 8.90E-02        |
| HLA-DQB1*03:01 | 18.83%             | 15.79%           | 21.98%            | 0.75        | 4.81E-01        | 0.106         | 5.02E-01        | 0.157         | 1.67E-01        | 0.012         | 8.79E-01        | -0.007        | 9.39E-01        |
| HLA-DQB1*03:02 | 11.38%             | 9.59%            | 13.23%            | 0.85        | 7.17E-01        | -0.144        | 4.27E-01        | <b>-0.284</b> | <b>2.61E-02</b> | -0.110        | 2.27E-01        | -0.140        | 1.51E-01        |
| HLA-DQB1*02:01 | 11.85%             | 12.78%           | 10.89%            | 1.23        | 5.86E-01        | 0.109         | 5.07E-01        | -0.092        | 5.12E-01        | 0.019         | 8.19E-01        | <b>-0.263</b> | <b>1.31E-02</b> |
| HLA-DQB1*05:01 | 11.19%             | 11.09%           | 11.28%            | 0.43        | 9.92E-02        | -0.100        | 5.72E-01        | 0.109         | 4.18E-01        | -0.003        | 9.70E-01        | 0.014         | 8.88E-01        |
| HLA-DQB1*02:02 | 11.66%             | 13.16%           | 10.12%            | 0.90        | 7.99E-01        | 0.200         | 2.20E-01        | 0.198         | 1.65E-01        | 0.097         | 2.36E-01        | -0.157        | 1.48E-01        |
| HLA-DQB1*06:02 | 10.99%             | 13.16%           | 8.75%             | 1.96        | 6.18E-02        | -0.092        | 5.76E-01        | -0.032        | 8.23E-01        | -0.035        | 6.67E-01        | <b>0.250</b>  | <b>2.16E-02</b> |
| HLA-DPB2*03:01 | 65.75%             | 64.57%           | 66.94%            | 0.84        | 7.21E-01        | -0.221        | 2.57E-01        | -0.244        | 1.22E-01        | 0.009         | 9.22E-01        | -0.173        | 1.48E-01        |
| HLA-DPB2*01:01 | 34.25%             | 35.43%           | 33.06%            | 0.74        | 4.31E-01        | 0.067         | 6.48E-01        | -0.079        | 5.00E-01        | 0.028         | 6.96E-01        | -0.017        | 8.51E-01        |

171

172

173

174

175

176 **Table S2:** Evaluating the association between psIgG4 and HLA-DQA1\*01:01 accounting for  
 177 PA. Results with p<0.05 are bolded.

178

| Model components | AVOIDERS       |          |                            |          |                   |          | CONSUMERS      |                 |                            |                 |                   |                 |
|------------------|----------------|----------|----------------------------|----------|-------------------|----------|----------------|-----------------|----------------------------|-----------------|-------------------|-----------------|
|                  | ORIGINAL MODEL |          | EXCLUDING SUBJECTS WITH PA |          | PA AS A COVARIATE |          | ORIGINAL MODEL |                 | EXCLUDING SUBJECTS WITH PA |                 | PA AS A COVARIATE |                 |
|                  | N=275          |          | N=227                      |          | N=275             |          | N=267          |                 | N=266                      |                 | N=267             |                 |
|                  | Beta           | P-Value  | Beta                       | P-Value  | Beta              | P-Value  | Beta           | P-Value         | Beta                       | P-Value         | Beta              | P-Value         |
| Age              | 0.023          | 2.57E-01 | 0.034                      | 1.33E-01 | 0.025             | 2.07E-01 | 0.027          | 2.54E-01        | 0.025                      | 2.81E-01        | 0.025             | 2.81E-01        |
| Sex              | 0.061          | 3.98E-01 | 0.038                      | 6.24E-01 | 0.053             | 4.59E-01 | 0.212          | 1.01E-02        | 0.207                      | 1.20E-02        | 0.207             | 1.20E-02        |
| PC1              | -1.255         | 1.29E-01 | -1.517                     | 1.05E-01 | -1.020            | 2.14E-01 | -1.241         | 1.95E-01        | -1.258                     | 1.90E-01        | -1.258            | 1.90E-01        |
| PC2              | -3.124         | 1.93E-03 | -2.156                     | 8.73E-02 | -2.927            | 3.36E-03 | -1.204         | 1.54E-01        | -1.185                     | 1.61E-01        | -1.185            | 1.61E-01        |
| PC3              | -0.560         | 5.36E-01 | 0.365                      | 7.39E-01 | -0.630            | 4.81E-01 | 0.965          | 2.78E-01        | 0.957                      | 2.82E-01        | 0.957             | 2.82E-01        |
| PC4              | 1.821          | 1.73E-02 | 0.989                      | 2.58E-01 | 1.789             | 1.80E-02 | -0.356         | 7.20E-01        | -0.376                     | 7.05E-01        | -0.376            | 7.05E-01        |
| PC5              | 0.480          | 5.35E-01 | 0.424                      | 6.19E-01 | 0.627             | 4.14E-01 | 0.451          | 6.33E-01        | 0.468                      | 6.21E-01        | 0.468             | 6.21E-01        |
| Peanut Allergy   | -              | -        | -                          | -        | 0.237             | 9.87E-03 | -              | -               | -                          | -               | -0.506            | 4.31E-01        |
| HLA-DQA1*01:02   | -0.071         | 3.40E-01 | -0.115                     | 1.66E-01 | -0.095            | 2.03E-01 | <b>0.342</b>   | <b>2.21E-04</b> | <b>0.339</b>               | <b>2.58E-04</b> | <b>0.339</b>      | <b>2.58E-04</b> |

179

180

181

182

183

184

185

186

187

188

189

190

191 **Table S3:** Association analysis results for HLA alleles with primary phenotypes of peanut  
 192 allergy, psIgG4 and psIgE at 60 months in participants of self-reported European ethnicity.  
 193 Results with p<0.05 are bolded.

194

| Alleles        | Allele Frequency (%)  |                     |                      | PA               |          | psIgE            |          |                      |          | psIgG4           |                 |                      |                 |
|----------------|-----------------------|---------------------|----------------------|------------------|----------|------------------|----------|----------------------|----------|------------------|-----------------|----------------------|-----------------|
|                | Full Group<br>(N=402) | Avoiders<br>(N=211) | Consumers<br>(N=191) | Avoiders (N=211) |          | Avoiders (N=211) |          | Consumers<br>(N=191) |          | Avoiders (N=211) |                 | Consumers<br>(N=191) |                 |
|                |                       |                     |                      | OR               | P-Value  | Beta             | P-Value  | Beta                 | P-Value  | Beta             | P-Value         | Beta                 | P-Value         |
| HLA-A*02:01    | 30.71%                | 31.91%              | 29.40%               | 0.55             | 1.65E-01 | -0.228           | 1.50E-01 | 0.187                | 1.13E-01 | <b>-0.165</b>    | <b>2.99E-02</b> | 0.084                | 4.11E-01        |
| HLA-B*07:02    | 11.68%                | 12.63%              | 10.66%               | 1.06             | 9.02E-01 | -0.190           | 3.17E-01 | -0.121               | 4.09E-01 | 0.034            | 7.09E-01        | 0.196                | 1.19E-01        |
| HLA-C*07:02    | 11.23%                | 11.36%              | 11.08%               | 1.39             | 5.12E-01 | -0.208           | 2.91E-01 | -0.160               | 2.78E-01 | -0.005           | 9.60E-01        | 0.161                | 2.03E-01        |
| HLA-G*01:01    | 83.29%                | 84.50%              | 81.94%               | 1.00             | 4.58E-01 | -0.211           | 6.54E-01 | 0.234                | 4.25E-01 | <b>-0.891</b>    | <b>1.00E-04</b> | -0.416               | 1.07E-01        |
| HLA-DQA1*01:02 | 14.95%                | 15.76%              | 14.05%               | <b>3.54</b>      | 3.63E-03 | 0.012            | 9.44E-01 | 0.023                | 8.64E-01 | -0.060           | 4.70E-01        | <b>0.395</b>         | <b>3.34E-04</b> |
| HLA-DQA1*05:01 | 13.53%                | 14.29%              | 12.70%               | 1.81             | 1.90E-01 | 0.147            | 4.19E-01 | 0.020                | 8.87E-01 | 0.041            | 6.44E-01        | -0.172               | 1.58E-01        |
| HLA-DQA1*01:03 | 6.06%                 | 5.91%               | 6.22%                | 0.59             | 5.00E-01 | 0.152            | 5.39E-01 | 0.181                | 3.07E-01 | 0.211            | 8.05E-02        | <b>0.382</b>         | <b>1.07E-02</b> |
| HLA-DQB1*03:02 | 12.72%                | 10.29%              | 15.41%               | 0.82             | 7.08E-01 | -0.202           | 3.17E-01 | -0.234               | 6.42E-02 | -0.182           | 6.59E-02        | -0.154               | 1.55E-01        |
| HLA-DQB1*02:01 | 12.72%                | 13.73%              | 11.62%               | 1.73             | 2.21E-01 | 0.165            | 3.77E-01 | -0.025               | 8.63E-01 | 0.046            | 6.15E-01        | -0.208               | 9.03E-02        |
| HLA-DQB1*06:02 | 10.54%                | 12.01%              | 8.92%                | 3.02             | 1.14E-02 | -0.076           | 6.84E-01 | -0.038               | 7.96E-01 | -0.032           | 7.27E-01        | <b>0.333</b>         | <b>8.32E-03</b> |

195

196

197

198

199

200

201

202

203

204

205

206

207 **Table S4:** Association of HLA haplotypes with frequency  $\geq 5\%$  with primary phenotypes of  
 208 peanut allergy, psIgG4 and psIgE at 60 months. Results with  $p < 0.05$  are bolded.

209

| Haplotypes                        | Haplotype Freq (%) |          |           | PA       |          | psIgE    |          |           |          | psIgG4   |          |               |                 |
|-----------------------------------|--------------------|----------|-----------|----------|----------|----------|----------|-----------|----------|----------|----------|---------------|-----------------|
|                                   | Full Group         | Avoiders | Consumers | Avoiders |          | Avoiders |          | Consumers |          | Avoiders |          | Consumers     |                 |
|                                   |                    |          |           | OR       | P-Value  | Beta     | P-Value  | Beta      | P-Value  | Beta     | P-Value  | Beta          | P-Value         |
| <b>HLA-DQA1~HLA-DQB1</b>          |                    |          |           |          |          |          |          |           |          |          |          |               |                 |
| DQA1*05:01~DQB1*02:01             | 12.00%             | 12.84%   | 11.13%    | 1.28     | 5.26E-01 | 0.143    | 3.92E-01 | -0.143    | 3.14E-01 | 0.036    | 6.73E-01 | <b>-0.305</b> | <b>4.31E-03</b> |
| DQA1*05:05~DQB1*03:01             | 11.51%             | 8.95%    | 14.17%    | 0.46     | 1.75E-01 | -0.005   | 9.81E-01 | 0.117     | 3.60E-01 | 0.098    | 3.20E-01 | 0.021         | 8.33E-01        |
| DQA1*01:02~DQB1*06:02             | 11.41%             | 13.62%   | 9.11%     | 1.96     | 6.35E-02 | -0.089   | 5.89E-01 | -0.054    | 7.10E-01 | -0.036   | 6.67E-01 | <b>0.242</b>  | <b>2.69E-02</b> |
| DQA1*02:01~DQB1*02:02             | 11.21%             | 12.84%   | 9.51%     | 1.06     | 8.79E-01 | 0.276    | 1.02E-01 | 0.167     | 2.57E-01 | 0.113    | 1.84E-01 | -0.137        | 2.22E-01        |
| DQA1*01:01~DQB1*05:01             | 10.02%             | 9.73%    | 10.32%    | 0.58     | 2.96E-01 | -0.101   | 5.85E-01 | 0.046     | 7.48E-01 | -0.023   | 8.09E-01 | -0.019        | 8.61E-01        |
| DQA1*03:01~DQB1*03:02             | 9.33%              | 7.78%    | 10.93%    | 0.96     | 9.32E-01 | -0.160   | 4.33E-01 | -0.213    | 1.21E-01 | -0.169   | 1.02E-01 | -0.056        | 5.91E-01        |
| DQA1*03:03~DQB1*03:01             | 6.35%              | 6.03%    | 6.68%     | 1.28     | 6.23E-01 | 0.272    | 2.14E-01 | 0.088     | 6.11E-01 | 0.009    | 9.32E-01 | -0.055        | 6.79E-01        |
| <b>HLA-DQA1~HLA-DQB1~HLA-DRB1</b> |                    |          |           |          |          |          |          |           |          |          |          |               |                 |
| DQA1*05:01~DQB1*02:01~DRB1*03:01  | 12.67%             | 14.44%   | 10.80%    | 0.93     | 8.70E-01 | -0.017   | 9.31E-01 | 0.064     | 7.05E-01 | -0.021   | 8.35E-01 | <b>-0.262</b> | <b>4.73E-02</b> |
| DQA1*02:01~DQB1*02:02~DRB1*07:01  | 12.40%             | 14.17%   | 10.51%    | 0.92     | 8.63E-01 | 0.268    | 1.71E-01 | 0.145     | 3.77E-01 | 0.164    | 1.07E-01 | -0.223        | 8.21E-02        |
| DQA1*01:02~DQB1*06:02~DRB1*15:01  | 10.06%             | 11.76%   | 8.24%     | 2.16     | 8.23E-02 | -0.173   | 3.91E-01 | -0.018    | 9.18E-01 | -0.028   | 7.86E-01 | <b>0.409</b>  | <b>2.94E-03</b> |
| DQA1*01:01~DQB1*05:01~DRB1*01:01  | 9.09%              | 7.75%    | 10.51%    | 0.86     | 7.99E-01 | -0.132   | 5.78E-01 | -0.106    | 5.21E-01 | -0.087   | 4.80E-01 | -0.039        | 7.65E-01        |
| DQA1*03:03~DQB1*03:01~DRB1*04:01  | 6.20%              | 6.42%    | 5.97%     | 1.99     | 2.05E-01 | 0.410    | 1.05E-01 | 0.030     | 8.84E-01 | 0.047    | 7.20E-01 | -0.026        | 8.74E-01        |

210

211

212

213

214

215

216

217

218

219

220 **Table S5.** Association of HLA Class II gene expression in CD4 T cells with rs17612852 and  
 221 DQA1\*01:02 genotypes. An additive model was used for rs17612852 SNP genotype, and a  
 222 dominant model was used for HLA-DQA1\*01:02 carrier status.

223

224

| Gene | Variant    | Minor allele | Beta*  | P-value* |
|------|------------|--------------|--------|----------|
| DRA  | rs17612852 | G            | 0.393  | 2.36E-02 |
|      | DQA1*01:02 | carrier      | 0.388  | 9.78E-02 |
| DRB5 | rs17612852 | G            | 0.466  | 3.79E-02 |
|      | DQA1*01:02 | carrier      | 0.821  | 4.53E-03 |
| DRB1 | rs17612852 | G            | 0.414  | 3.66E-03 |
|      | DQA1*01:02 | carrier      | 0.534  | 5.00E-03 |
| DQA1 | rs17612852 | G            | 1.303  | 1.66E-07 |
|      | DQA1*01:02 | carrier      | 1.182  | 7.72E-04 |
| DQB1 | rs17612852 | G            | 1.567  | 8.34E-13 |
|      | DQA1*01:02 | carrier      | 1.396  | 1.27E-05 |
| DPA1 | rs17612852 | G            | 0.418  | 7.08E-03 |
|      | DQA1*01:02 | carrier      | 0.457  | 3.30E-02 |
| DPB1 | rs17612852 | G            | -0.035 | 7.90E-01 |
|      | DQA1*01:02 | carrier      | -0.007 | 9.68E-01 |

225 *\*Linear regression adjusted for sex, race, allergic status, treatment group, and cell viability.*

226

227

228

229

230

231

232

233

234

235

236

237

238

239

240

241

242

243 **Table S6:** Sample sizes for each phenotype by timepoint from the total of 267 Consumers and  
 244 275 avoiders.

245  
 246

| Phenotypes   | Consumers Avoiders |     | Consumers Avoiders |     | Consumers Avoiders |     | Consumers Avoiders |     | Consumers Avoiders |     |
|--------------|--------------------|-----|--------------------|-----|--------------------|-----|--------------------|-----|--------------------|-----|
|              | V0                 |     | V12                |     | V30                |     | V60                |     | V72                |     |
| psIgE        | 265                | 274 | 262                | 273 | 260                | 264 | 255                | 266 | 214                | 238 |
| Ara h 1 IgE  | 260                | 271 | 260                | 273 | 259                | 263 | 251                | 261 | 209                | 231 |
| Ara h 2 IgE  | 260                | 271 | 260                | 273 | 259                | 263 | 251                | 261 | 209                | 230 |
| Ara h 3 IgE  | 260                | 271 | 260                | 273 | 259                | 263 | 251                | 261 | 209                | 230 |
| Ara h 8 IgE  | 260                | 270 | 260                | 273 | 259                | 263 | 250                | 261 | 208                | 230 |
| Ara h 9 IgE  | 260                | 271 | 259                | 272 | 258                | 262 | 251                | 261 | 207                | 230 |
| psIgG4       | 260                | 269 | 257                | 273 | 259                | 264 | 254                | 265 | 213                | 238 |
| Ara h 1 IgG4 | 241                | 241 | 231                | 238 | 234                | 231 | 249                | 254 | 152                | 214 |
| Ara h 2 IgG4 | 241                | 241 | 231                | 238 | 234                | 231 | 249                | 254 | 152                | 214 |
| Ara h 3 IgG4 | 241                | 241 | 231                | 238 | 234                | 231 | 249                | 254 | 152                | 214 |
| Ara h 8 IgG4 | 241                | 241 | 231                | 238 | 234                | 231 | 249                | 254 | 152                | 214 |
| Ara h 9 IgG4 | 241                | 241 | 231                | 238 | 234                | 231 | 249                | 254 | 152                | 214 |

247

248

249

250

251

252

253

254

255

256

257

258

259

260

261

262 **Table S7:** Linear regression models for psIgG4 to determine the direct vs. indirect effects of  
 263 *MALT1* (rs57265082) and HLA-DQA1\*01:02. Five linear regression models (M1-M5) were  
 264 run on log10(psIgG4), all of which included covariates of age, sex and 5PCs. In all models  
 265 rs57265082 and HLA-DQA1\*01:02 were coded as dominant (i.e. carrier vs. non-carrier); the  
 266 minor heterozygote and homozygote for rs57265082 were combined to facilitate the  
 267 interactions being tested with peanut exposure. Exact variables in each model are listed as  
 268 Model components in the table. M1 was run in the full group of avoiders and consumers  
 269 combined, and included both genetic variants, log10(psIgE), peanut consumption and  
 270 interactions with peanut consumption. Models M2-M3 were performed in the Avoiders alone  
 271 to see how much of the effect of each genetic variant on psIgG4 was mediated through psIgE.  
 272 Models M4-M5 were performed in Consumers alone to see how much of the effect of each  
 273 genetic variant on psIgG4 was mediated through psIgE.  
 274  
 275

| Model components                      | FULL GROUP N=542 |                    | AVOIDERS N=275 |              |        |              | CONSUMERS N=267 |            |        |            |
|---------------------------------------|------------------|--------------------|----------------|--------------|--------|--------------|-----------------|------------|--------|------------|
|                                       | Est              | M1 P-value         | Est            | M2 P-value   | Est    | M3 P-value   | Est             | M4 P-value | Est    | M5 P-value |
| Age                                   | 0.032            | 2.30E-02 *         | 0.026          | 1.99E-01     | 0.022  | 2.51E-01     | 0.024           | 3.07E-01   | 0.039  | 6.20E-02 . |
| Sex                                   | 0.062            | 2.11E-01           | 0.059          | 4.07E-01     | 0.019  | 7.75E-01     | 0.188           | 2.13E-02 * | 0.103  | 1.61E-01   |
| PC1                                   | -0.151           | 8.09E-01           | -1.456         | 8.31E-02 .   | -0.520 | 5.18E-01     | -1.556          | 1.52E-01   | 0.181  | 8.56E-01   |
| PC2                                   | -1.179           | 4.69E-02 *         | -2.585         | 8.81E-03 **  | -2.061 | 2.69E-02 *   | -1.780          | 4.28E-02 * | -0.740 | 3.52E-01   |
| PC3                                   | 0.104            | 8.54E-01           | -0.257         | 7.71E-01     | -0.163 | 8.45E-01     | 0.652           | 4.58E-01   | 0.144  | 8.55E-01   |
| PC4                                   | 0.734            | 1.83E-01           | 1.624          | 2.99E-02 *   | 1.450  | 3.95E-02 *   | -0.651          | 5.08E-01   | -0.113 | 8.98E-01   |
| PC5                                   | 0.949            | 9.65E-02 .         | 0.623          | 4.17E-01     | 0.678  | 3.49E-01     | 1.483           | 1.51E-01   | 1.296  | 1.60E-01   |
| HLA-DQA1*01:02                        | -0.036           | 5.65E-01           | -0.076         | 2.44E-01     | -0.040 | 5.10E-01     | 0.250           | 2.64E-03 * | 0.244  | 1.05E-03 * |
| MALT1 (rs57265082)                    | 0.249            | 2.72E-02 *         | 0.420          | 1.63E-04 *** | 0.235  | 3.12E-02 *   | -0.313          | 2.48E-02 * | -0.138 | 2.76E-01   |
| Log10(psIgE)                          | 0.180            | 1.92E-08 ***       |                |              | 0.175  | 3.08E-08 *** |                 |            | 0.332  | 5.50E-13 * |
| Peanut Consumption                    | 0.754            | < 2e-16 ***        |                |              |        |              |                 |            |        |            |
| <b>HLA*Peanut Consumption</b>         | <b>0.283</b>     | <b>2.44E-03 **</b> |                |              |        |              |                 |            |        |            |
| <b>MALT1*group Peanut Consumption</b> | <b>-0.414</b>    | <b>1.00E-02 *</b>  |                |              |        |              |                 |            |        |            |
| <b>psIgE*group Peanut Consumption</b> | <b>0.149</b>     | <b>3.15E-03 **</b> |                |              |        |              |                 |            |        |            |

276 ## Signif. codes: '\*\*\*' for < 0.001, '\*\*' for < 0.01, '\*' for < 0.05, and '.' for < 0.1  
 277 Interaction terms with Peanut Consumption are in bold  
 278 Est == Beta estimates of the individual predictor variable in the linear regression models  
 279 P-values == p-value of individual predictor variables

280  
 281  
 282  
 283  
 284  
 285  
 286



287 **Table S8A:** Model parameter estimates from the mixed linear model in Fig 3A.

288

| Outcome                      | Term                                                             | Estimate | P-value  | 95% Lower | 95% Upper |
|------------------------------|------------------------------------------------------------------|----------|----------|-----------|-----------|
| Peanut-specific IgG4 (log10) | Intercept                                                        | 2.02     | 4e-322   | 1.97      | 2.07      |
|                              | Treatment Group [Peanut Avoidance]                               | -0.30    | 3.00E-47 | -0.34     | -0.26     |
|                              | Age at Visit (years)                                             | 0.14     | 1.00E-85 | 0.13      | 0.15      |
|                              | (Age at Visit (years))*Treatment Group[Peanut Avoidance]         | -0.05    | 6.00E-14 | -0.06     | -0.04     |
|                              | HLA DQA1 01:02:01:01[Carrier]                                    | 0.05     | 8.50E-03 | 0.01      | 0.08      |
|                              | Treatment Group [Peanut Avoidance]*HLA DQA1 01:02:01:01[Carrier] | -0.06    | 2.30E-03 | -0.09     | -0.02     |
| Ara h 1 IgG4 (log10)         | Intercept                                                        | 1.60     | 4e-322   | 1.57      | 1.64      |
|                              | Treatment Group [Peanut Avoidance]                               | -0.08    | 5.00E-10 | -0.11     | -0.06     |
|                              | Age at Visit (years)                                             | 0.03     | 5.00E-12 | 0.02      | 0.04      |
|                              | (Age at Visit (years))*Treatment Group[Peanut Avoidance]         | -0.02    | 5.80E-07 | -0.03     | -0.01     |
|                              | HLA DQA1 01:02:01:01[Carrier]                                    | 0.00     | 7.90E-01 | -0.02     | 0.03      |
|                              | Treatment Group [Peanut Avoidance]*HLA DQA1 01:02:01:01[Carrier] | 0.00     | 9.10E-01 | -0.02     | 0.03      |
| Ara h 2 IgG4 (log10)         | Intercept                                                        | 1.64     | 4e-311   | 1.60      | 1.68      |
|                              | Treatment Group [Peanut Avoidance]                               | -0.22    | 3.00E-33 | -0.26     | -0.19     |
|                              | Age at Visit (years)                                             | 0.07     | 4.00E-30 | 0.06      | 0.08      |
|                              | (Age at Visit (years))*Treatment Group[Peanut Avoidance]         | -0.05    | 4.00E-20 | -0.06     | -0.04     |
|                              | HLA DQA1 01:02:01:01[Carrier]                                    | 0.08     | 2.40E-06 | 0.05      | 0.11      |
|                              | Treatment Group [Peanut Avoidance]*HLA DQA1 01:02:01:01[Carrier] | -0.07    | 2.70E-05 | -0.11     | -0.04     |
| Ara h 3 IgG4 (log10)         | Intercept                                                        | 2.03     | 4e-322   | 1.98      | 2.07      |
|                              | Treatment Group [Peanut Avoidance]                               | -0.18    | 3.00E-22 | -0.21     | -0.15     |
|                              | Age at Visit (years)                                             | 0.08     | 2.00E-35 | 0.07      | 0.09      |
|                              | (Age at Visit (years))*Treatment Group[Peanut Avoidance]         | -0.03    | 6.20E-06 | -0.04     | -0.02     |
|                              | HLA DQA1 01:02:01:01[Carrier]                                    | 0.01     | 4.10E-01 | -0.02     | 0.05      |
|                              | Treatment Group [Peanut Avoidance]*HLA DQA1 01:02:01:01[Carrier] | 0.00     | 8.40E-01 | -0.04     | 0.03      |
| Ara h 8 IgG4 (log10)         | Intercept                                                        | 1.54     | 4e-322   | 1.51      | 1.56      |
|                              | Treatment Group [Peanut Avoidance]                               | 0.01     | 2.40E-01 | -0.01     | 0.02      |
|                              | Age at Visit (years)                                             | 0.02     | 5.40E-08 | 0.01      | 0.02      |
|                              | (Age at Visit (years))*Treatment Group[Peanut Avoidance]         | 0.00     | 1.80E-01 | 0.00      | 0.01      |
|                              | HLA DQA1 01:02:01:01[Carrier]                                    | 0.00     | 7.90E-01 | -0.01     | 0.02      |
|                              | Treatment Group [Peanut Avoidance]*HLA DQA1 01:02:01:01[Carrier] | 0.01     | 2.30E-01 | -0.01     | 0.02      |
| Ara h 9 IgG4 (log10)         | Intercept                                                        | 1.54     | 4e-322   | 1.50      | 1.57      |
|                              | Treatment Group [Peanut Avoidance]                               | -0.02    | 6.50E-02 | -0.05     | 0.00      |
|                              | Age at Visit (years)                                             | 0.04     | 9.00E-16 | 0.03      | 0.05      |
|                              | (Age at Visit (years))*Treatment Group[Peanut Avoidance]         | -0.01    | 7.60E-02 | -0.02     | 0.00      |
|                              | HLA DQA1 01:02:01:01[Carrier]                                    | 0.03     | 1.70E-02 | 0.01      | 0.06      |
|                              | Treatment Group [Peanut Avoidance]*HLA DQA1 01:02:01:01[Carrier] | -0.02    | 8.70E-02 | -0.05     | 0.00      |

289

290

291

292

293 **Table S8B:** Model parameter estimates from the mixed linear model in Fig 3B.

294

295

| Outcome                               | Term                                                                | Estimate | P-value    | 95% Lower | 95% Upper |
|---------------------------------------|---------------------------------------------------------------------|----------|------------|-----------|-----------|
| Peanut-Specific IgE (kU/liter, log10) | Intercept                                                           | -0.97    | 8.57E-56   | -1.08     | -0.86     |
|                                       | Treatment Group [Peanut Avoidance]                                  | 0.13     | 1.33E-02   | 0.03      | 0.24      |
|                                       | MALT1 Risk Groups (ALL)[Carrier]                                    | 0.26     | 1.35E-06   | 0.16      | 0.37      |
|                                       | Treatment Group [Peanut Avoidance]*MALT1 Risk Groups (ALL)[Carrier] | 0.19     | 4.55E-04   | 0.08      | 0.29      |
|                                       | Age at Visit (years)                                                | 0.06     | 2.42E-14   | 0.04      | 0.07      |
|                                       | (Age at Visit (years))*Treatment Group[Peanut Avoidance]            | -0.01    | 4.10E-01   | -0.02     | 0.01      |
| Ara h1-Specific IgE (kU/liter, log10) | Intercept                                                           | -1.47    | 2.86E-170  | -1.55     | -1.40     |
|                                       | Treatment Group [Peanut Avoidance]                                  | 0.11     | 4.73E-03   | 0.03      | 0.18      |
|                                       | MALT1 Risk Groups (ALL)[Carrier]                                    | 0.19     | 6.92E-07   | 0.12      | 0.26      |
|                                       | Treatment Group [Peanut Avoidance]*MALT1 Risk Groups (ALL)[Carrier] | 0.12     | 2.32E-03   | 0.04      | 0.19      |
|                                       | Age at Visit (years)                                                | -0.01    | 4.16E-02   | -0.02     | 0.00      |
|                                       | (Age at Visit (years))*Treatment Group[Peanut Avoidance]            | 0.01     | 5.02E-03   | 0.00      | 0.02      |
| Ara h2-Specific IgE (kU/liter, log10) | Intercept                                                           | -1.47    | 5.42E-180  | -1.55     | -1.39     |
|                                       | Treatment Group [Peanut Avoidance]                                  | 0.11     | 2.79E-03   | 0.04      | 0.18      |
|                                       | MALT1 Risk Groups (ALL)[Carrier]                                    | 0.20     | 3.01E-08   | 0.13      | 0.27      |
|                                       | Treatment Group [Peanut Avoidance]*MALT1 Risk Groups (ALL)[Carrier] | 0.14     | 1.37E-04   | 0.07      | 0.21      |
|                                       | Age at Visit (years)                                                | 0.02     | 8.99E-03   | 0.00      | 0.03      |
|                                       | (Age at Visit (years))*Treatment Group[Peanut Avoidance]            | 0.02     | 5.63E-03   | 0.01      | 0.03      |
| Ara h3-Specific IgE (kU/liter, log10) | Intercept                                                           | -1.58    | 9.95E-212  | -1.65     | -1.51     |
|                                       | Treatment Group [Peanut Avoidance]                                  | 0.05     | 1.69E-01   | -0.02     | 0.11      |
|                                       | MALT1 Risk Groups (ALL)[Carrier]                                    | 0.13     | 1.24E-04   | 0.06      | 0.19      |
|                                       | Treatment Group [Peanut Avoidance]*MALT1 Risk Groups (ALL)[Carrier] | 0.11     | 1.33E-03   | 0.04      | 0.17      |
|                                       | Age at Visit (years)                                                | 0.01     | 4.80E-02   | 0.00      | 0.02      |
|                                       | (Age at Visit (years))*Treatment Group[Peanut Avoidance]            | 0.00     | 7.09E-01   | -0.01     | 0.01      |
| Ara h8-Specific IgE (kU/liter, log10) | Intercept                                                           | -1.97    | 2.978e-320 | -2.03     | -1.90     |
|                                       | Treatment Group [Peanut Avoidance]                                  | 0.04     | 1.90E-01   | -0.02     | 0.09      |
|                                       | MALT1 Risk Groups (ALL)[Carrier]                                    | 0.06     | 2.31E-02   | 0.01      | 0.11      |
|                                       | Treatment Group [Peanut Avoidance]*MALT1 Risk Groups (ALL)[Carrier] | 0.08     | 2.90E-03   | 0.03      | 0.13      |
|                                       | Age at Visit (years)                                                | 0.09     | 1.47E-30   | 0.07      | 0.10      |
|                                       | (Age at Visit (years))*Treatment Group[Peanut Avoidance]            | -0.01    | 5.40E-02   | -0.03     | 0.00      |
| Ara h9-Specific IgE (kU/liter, log10) | Intercept                                                           | -1.86    | 4.2e-322   | -1.90     | -1.81     |
|                                       | Treatment Group [Peanut Avoidance]                                  | 0.01     | 6.48E-01   | -0.03     | 0.05      |
|                                       | MALT1 Risk Groups (ALL)[Carrier]                                    | 0.08     | 1.32E-04   | 0.04      | 0.12      |
|                                       | Treatment Group [Peanut Avoidance]*MALT1 Risk Groups (ALL)[Carrier] | 0.03     | 2.18E-01   | -0.02     | 0.07      |
|                                       | Age at Visit (years)                                                | 0.02     | 9.08E-12   | 0.02      | 0.03      |
|                                       | (Age at Visit (years))*Treatment Group[Peanut Avoidance]            | -0.01    | 8.90E-02   | -0.01     | 0.00      |

296

297

298

299  
300  
301

**Table S9:** Demographics and clinical outcomes of participants included in epitope analysis.

| <b>Demographics</b>              | <b>Consumers (N=161)</b> | <b>Avoiders (N=162)</b> |
|----------------------------------|--------------------------|-------------------------|
| Age at screening (mo), mean (SD) | 7.61 (1.78)              | 7.78 (1.75)             |
| Male sex (N)                     | 52.8% (85)               | 65.4% (106)             |
| Ethnicity (N)                    |                          |                         |
| White                            | 67% (108)                | 74% (120)               |
| Black                            | 9% (15)                  | 10% (17)                |
| Mixed                            | 16% (26)                 | 12% (19)                |
| Asian                            | 6% (9)                   | 2% (4)                  |
| Chinese, Middle Eastern or other | 2% (3)                   | 1% (2)                  |
| <b>Outcomes at 60 months</b>     |                          |                         |
| PA (allergics/non-allergics)     | 0/161                    | 37/125                  |
| psIgE                            | 0.17 [0.13;0.24]         | 0.23 [0.15;0.34]        |
| Ara h 1 IgE                      | 0.02 [0.02;0.02]         | 0.04 [0.02;0.05]        |
| Ara h 2 IgE                      | 0.02 [0.02;0.03]         | 0.05 [0.03;0.07]        |
| Ara h 3 IgE                      | 0.03 [0.02;0.04]         | 0.03 [0.02;0.04]        |
| Ara h 8 IgE                      | 0.04 [0.03;0.06]         | 0.04 [0.03;0.05]        |
| Ara h 9 IgE                      | 0.02 [0.02;0.03]         | 0.02 [0.02;0.02]        |
| psIgG4                           | 1140.74 [903.63;1440.08] | 207.70 [168.44;256.11]  |
| Ara h 1 IgG4                     | 73.29 [60.62;88.60]      | 40.55 [37.46;43.89]     |
| Ara h 2 IgG4                     | 179.49 [137.83;233.74]   | 41.81 [38.26;45.69]     |
| Ara h 3 IgG4                     | 423.33 [338.60;529.25]   | 145.79 [118.49;179.39]  |
| Ara h 8 IgG4                     | 41.03 [37.34;45.09]      | 45.16 [39.47;51.66]     |
| Ara h 9 IgG4                     | 69.11 [55.23;86.47]      | 52.99 [44.75;62.75]     |

302  
303  
304  
305  
306  
307  
308  
309  
310  
311  
312

313 **Table S10:** HLA associations with psIgG in LEAP consumers at 60 months  
 314

|                       | log10(psIgG4) |          | log10(psIgG) |          | log10(psIgG)<br>adjusted for<br>psIgG4 |         | log10(psIgG)<br>adjusted for Ara<br>h2 IgG4 |         |
|-----------------------|---------------|----------|--------------|----------|----------------------------------------|---------|---------------------------------------------|---------|
|                       | Beta          | P-value  | Beta         | P-value  | Beta                                   | P-value | Beta                                        | P-value |
| <b>HLA-DQA1*01:02</b> | 0.342         | 2.21E-04 | 0.111        | 3.09E-02 | -0.017                                 | 0.67    | -0.018                                      | 0.69    |
| <b>rs17612852</b>     | 0.342         | 5.80E-07 | 0.142        | 1.63E-04 | 0.018                                  | 0.54    | 0.049                                       | 0.15    |

315  
 316  
 317  
 318  
 319  
 320  
 321  
 322  
 323  
 324  
 325  
 326  
 327  
 328  
 329  
 330  
 331  
 332  
 333  
 334  
 335  
 336  
 337  
 338  
 339  
 340  
 341  
 342  
 343  
 344  
 345  
 346  
 347  
 348  
 349  
 350  
 351  
 352  
 353  
 354  
 355

356 **Table S11:** Association of peanut allergy (PA) associated HLA variants from previous studies  
357 with PA in LEAP peanut avoidance group and psIgG4 in LEAP peanut consumption group.  
358 [A] PA associated HLA SNPs, [B] PA associated imputed HLA alleles. LD for SNPs was  
359 calculated with respect to rs17612852 and for alleles with HLA-DQA1\*01:02. Peak variants  
360 (rs17612852 and HLA-DQA1\*01:02) in the LEAP study are bolded.  
361  
362

| Previous studies       |                       |             |                   |                          | LEAP study |                                                                   |             |                                                             |              |                 |            |            |
|------------------------|-----------------------|-------------|-------------------|--------------------------|------------|-------------------------------------------------------------------|-------------|-------------------------------------------------------------|--------------|-----------------|------------|------------|
|                        | OR                    | P           | Gene/Nearest gene | Alleles                  | MA F*      | Association with Peanut Allergy in peanut avoidance group (N=275) |             | Association with psIgG4 in peanut consumption group (N=267) |              | R-sq            | D'         |            |
|                        |                       |             |                   |                          |            | OR                                                                | P           | Beta                                                        | P            |                 |            |            |
| <b>[A] HLA SNPs</b>    |                       |             |                   |                          |            |                                                                   |             |                                                             |              |                 |            |            |
| Hong et al. (1)        | rs7192                | 1.7         | 5.50E-08          | HLA-DRA                  | T/G        | 0.35                                                              | 1.55        | 5.23E-02                                                    | 0.179        | 4.99E-03        | 0.21       | 0.62       |
|                        | rs9275596             | 1.7         | 6.80E-10          | HLA-DQB1 HLA-DQA2        | C/T        | 0.32                                                              | 1.55        | 8.37E-02                                                    | 0.135        | 4.04E-02        | 0.36       | 0.75       |
|                        | rs33980016            | NA          | 3.20E-11          | HLA-DQB1                 | -          | -                                                                 | -           | -                                                           | -            | -               | -          | -          |
| Marenholz et al. (2)   | rs9273440             | 0.66        | 6.60E-07          | HLA-DQB1                 | -          | -                                                                 | -           | -                                                           | -            | -               | -          | -          |
| Asai et al.(3)         | rs1049213             | NA          | 1.82E-11          | HLA-DQB1                 | -          | -                                                                 | -           | -                                                           | -            | -               | -          | -          |
|                        | rs3134976             | 2.11        | 2.15E-10          | HLA-DQB1 HLA-DQA2        | A/C        | 0.19                                                              | 1.57        | 1.23E-01                                                    | 0.264        | 5.46E-04        | 0.76       | 0.98       |
|                        | rs3134994             | 2.11        | 2.15E-10          | HLA-DQB1 HLA-DQA2        | T/C        | 0.19                                                              | 1.57        | 1.23E-01                                                    | 0.264        | 5.46E-04        | 0.76       | 0.98       |
|                        | rs3135006             | 2.1         | 2.45E-10          | HLA-DQB1                 | T/C        | 0.20                                                              | 1.61        | 1.04E-01                                                    | 0.285        | 1.75E-04        | 0.79       | 0.98       |
|                        | rs3134995             | 2.1         | 3.17E-10          | HLA-DQB1 HLA-DQA2        | T/C        | 0.19                                                              | 1.67        | 8.31E-02                                                    | 0.264        | 5.46E-04        | 0.75       | 0.98       |
|                        | rs3135190             | 2.08        | 4.66E-10          | HLA-DQB1 HLA-DQA2        | T/G        | 0.20                                                              | 1.68        | 7.71E-02                                                    | 0.285        | 1.75E-04        | 0.78       | 0.98       |
|                        | rs1049053             | 2.08        | 4.66E-10          | HLA-DQB1                 | C/T        | 0.20                                                              | 1.61        | 1.04E-01                                                    | 0.297        | 1.21E-04        | 0.80       | 0.99       |
|                        | rs1049225             | 2.08        | 4.66E-10          | HLA-DQB1                 | A/G        | 0.20                                                              | 1.61        | 1.04E-01                                                    | 0.282        | 2.22E-04        | 0.79       | 0.99       |
|                        | <b>rs17612852</b>     | <b>1.99</b> | <b>1.86E-09</b>   | <b>HLA-DQA1 HLA-DQB1</b> | <b>G/A</b> | <b>0.23</b>                                                       | <b>1.30</b> | <b>3.27E-01</b>                                             | <b>0.342</b> | <b>5.80E-07</b> | <b>ref</b> | <b>ref</b> |
|                        | rs9275596             | 1.76        | 1.04E-07          | HLA-DQB1 HLA-DQA2        | C/T        | 0.32                                                              | 1.55        | 8.37E-02                                                    | 0.135        | 4.04E-02        | 0.36       | 0.75       |
|                        | rs1612904             | 1.76        | 1.36E-07          | HLA-DQB1 HLA-DQA2        | C/A        | 0.32                                                              | 1.55        | 8.37E-02                                                    | 0.135        | 3.80E-02        | 0.37       | 0.76       |
|                        | rs3135002             | 1.97        | 1.61E-07          | HLA-DQB1 HLA-DQA2        | -          | -                                                                 | -           | -                                                           | -            | -               | -          | -          |
|                        | rs7774434             | 0.58        | 2.22E-07          | HLA-DQB1 HLA-DQA2        | C/T        | 0.41                                                              | 0.68        | 1.08E-01                                                    | 0.128        | 3.41E-02        | 0.11       | 0.73       |
|                        | rs1049056             | 0.47        | 2.75E-07          | HLA-DQB1                 | -          | -                                                                 | -           | -                                                           | -            | -               | -          | -          |
| rs4947344              | 1.71                  | 4.19E-07    | HLA-DQB1 HLA-DQA2 | T/C                      | 0.26       | 1.71                                                              | 4.55E-02    | 0.159                                                       | 1.99E-02     | 0.52            | 0.78       |            |
| rs1794275              | 0.51                  | 8.22E-07    | HLA-DQB1 HLA-DQA2 | A/G                      | 0.18       | 0.73                                                              | 3.08E-01    | 0.110                                                       | 1.49E-01     | 0.04            | 0.76       |            |
| rs7767167              | 1.95                  | 1.12E-07    | HLA-DQB2 HLA-DOB  | G/A                      | 0.11       | 1.67                                                              | 1.03E-01    | 0.130                                                       | 2.30E-01     | 0.14            | 0.61       |            |
| <b>[B] HLA Alleles</b> |                       |             |                   |                          |            |                                                                   |             |                                                             |              |                 |            |            |
| Hong et al. (1)        | <b>HLA-DQA1*01:02</b> | NA          | <b>2.70E-08</b>   | <b>HLA-DQA1</b>          | -          | <b>0.17</b>                                                       | <b>1.99</b> | <b>4.37E-02</b>                                             | <b>0.342</b> | <b>2.21E-04</b> | <b>ref</b> | <b>ref</b> |
|                        | HLA-DQB1*06           | NA          | 5.40E-09          | HLA-DQB1                 | -          | -                                                                 | -           | -                                                           | -            | -               | -          | -          |
| Martino et al. (4)     | HLA-DQB1*06           | 2.26        | 1.20E-03          | HLA-DQB1                 | -          | -                                                                 | -           | -                                                           | -            | -               | -          | -          |
|                        | HLA-DPB1*03           | 3.23        | 4.25E-03          | HLA-DPB1                 | -          | -                                                                 | -           | -                                                           | -            | -               | -          | -          |
|                        | HLA-DQA1*02           | 0.36        | 1.48E-02          | HLA-DQA1                 | -          | -                                                                 | -           | -                                                           | -            | -               | -          | -          |
|                        | HLA-DRB1*15           | 2.15        | 1.60E-02          | HLA-DRB1                 | -          | -                                                                 | -           | -                                                           | -            | -               | -          | -          |
|                        | HLA-DRB1*07           | 0.34        | 1.68E-02          | HLA-DRB1                 | -          | -                                                                 | -           | -                                                           | -            | -               | -          | -          |
|                        | HLA-DPB1*03:01        | 3.23        | 4.25E-02          | HLA-DPB1                 | -          | -                                                                 | -           | -                                                           | -            | -               | -          | -          |
|                        | HLA-DQA1*02:01        | 0.36        | 1.48E-02          | HLA-DQA1                 | -          | 0.14                                                              | 0.92        | 8.34E-01                                                    | 0.127        | 1.95E-01        | 0.03       | 1.00       |
|                        | HLA-DRB1*07:01        | 0.34        | 1.68E-02          | HLA-DRB1                 | -          | -                                                                 | -           | -                                                           | -            | -               | -          | -          |
|                        | HLA-DQB1*06:02        | 2.11        | 1.72E-02          | HLA-DQB1                 | -          | 0.11                                                              | 1.96        | 6.18E-02                                                    | 0.250        | 2.16E-02        | 0.02       | 1.00       |
|                        | <b>HLA-DQA1*01:02</b> | <b>1.81</b> | <b>1.75E-02</b>   | <b>HLA-DQA1</b>          | -          | <b>0.17</b>                                                       | <b>1.99</b> | <b>4.37E-02</b>                                             | <b>0.342</b> | <b>2.21E-04</b> | <b>ref</b> | <b>ref</b> |

363

364

365

366

367
